# Supplementary material for: Automated image analysis detects aging in clinical-grade mesenchymal stromal cell cultures
Source: PubMed Central journal article supplement (PMC5763576; doi:10.1186/s13287-017-0740-x), 2018-01-10
Supplement: 13287_2017_740_MOESM3_ESM.pdf [file 13287_2017_740_MOESM3_ESM.pdf]

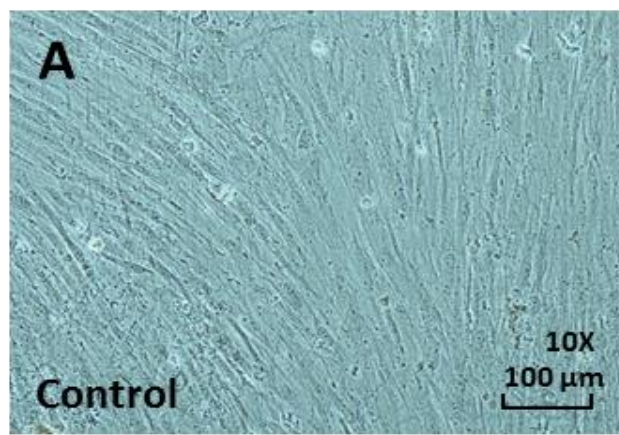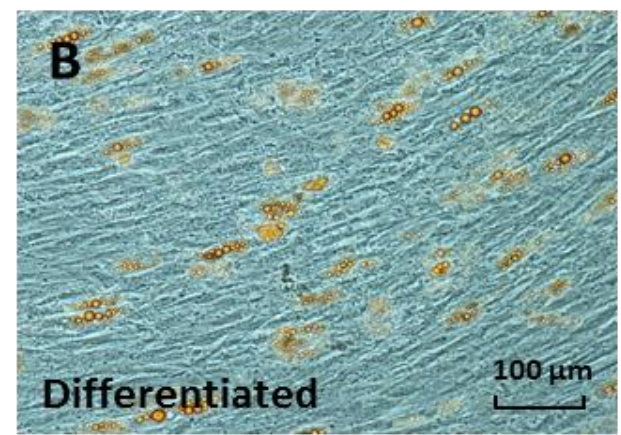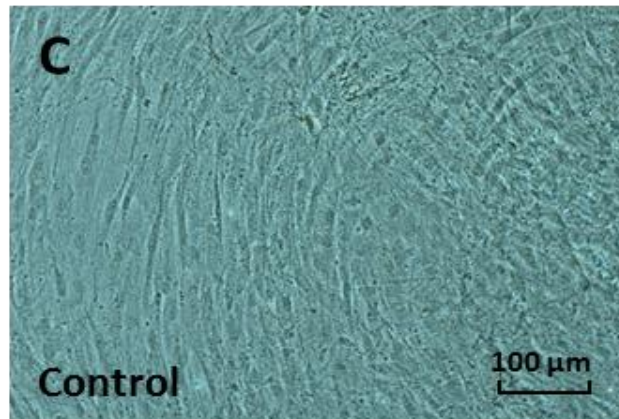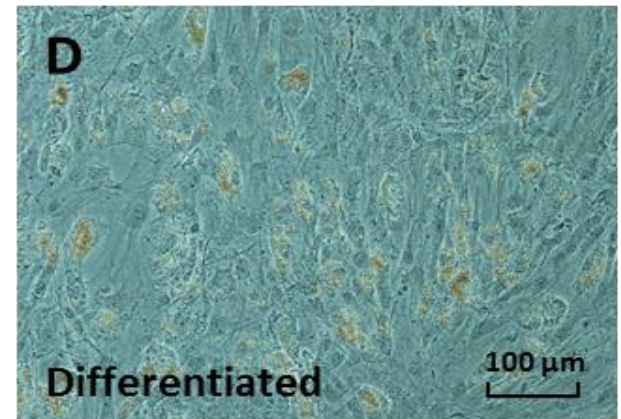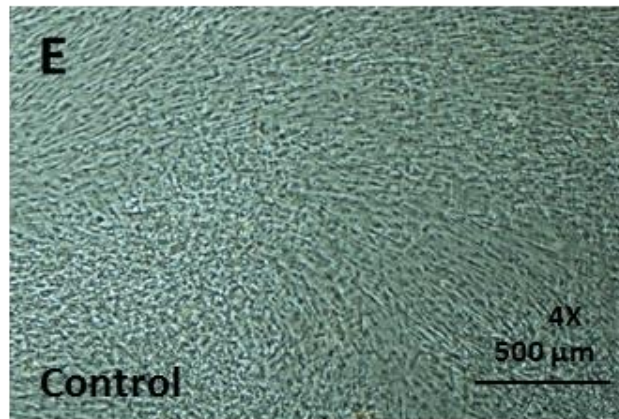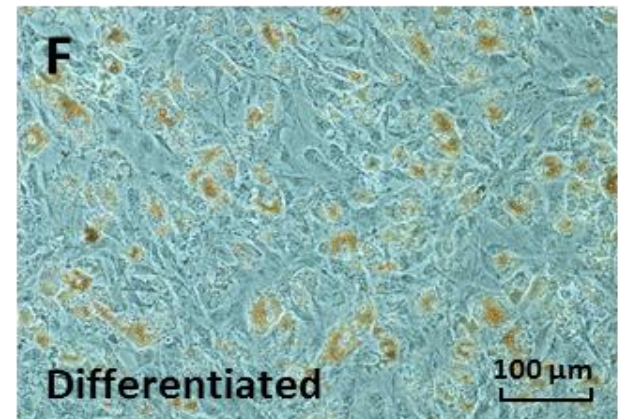

Supplementary Figure 2. Oja S. *et al.*
